# Supplementary material for: Nuclear Outsourcing of RNA Interference Components to Human Mitochondria
Source: PubMed Central journal article supplement (PMC3113838; doi:10.1371/journal.pone.0020746), 2011-06-13
Supplement: pone.0020746.s001.pdf [file pone.0020746.s001.pdf]

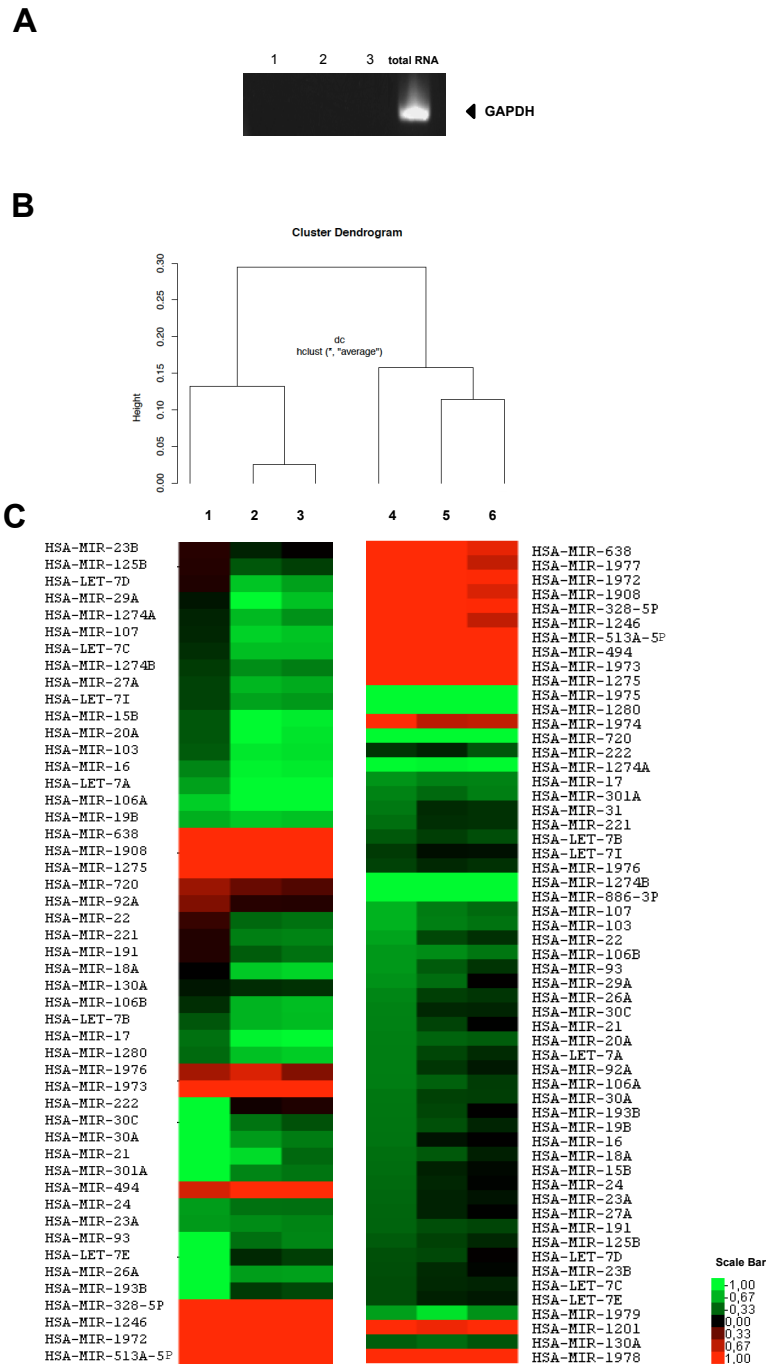

**Figure S1: MiRNA profiling of HeLa mitochondria with or without RNase A treatment.** A-C. HeLa mitochondrial fractions were treated with RNase A either for 15 min at 20°C (lanes 1) or for 30 min at 4°C (lanes 2 and 3). A. RT-PCR analysis of GAPDH in HeLa mitochondrial fractions. Total RNA is extracted from HeLa cells. B. Analysis of microarray data by hierarchical clustering in R software using Spearman correlation similarity measure and average. C. Heatmaps of microarray data with (left panel) or without (right panel) RNase A treatment. Each column (1 to 6) represents one independent mitochondrial isolation experiment.
